# Supplementary material for: Simulating atmospheric tracer concentrations for spatially distributed receptors: updates to the Stochastic Time-Inverted Lagrangian Transport model's R interface (STILT-R version 2)
Source: Copernicus journal article supplement (doi:10.5194/gmd-2018-20), 2018-03-02
Supplement: Supplementary file [file gmd-2018-20-AC1-supplement.pdf]

# Response to Reviewer 1

We thank the reviewers for their constructive feedback on our manuscript (<https://www.geosci-model-dev-discuss.net/gmd-2018-20/>). The reviewers' comments are shown below in *italics* with our responses directly following.

## **Anonymous Referee #1**

*Fasoli et al report on developments made for the Stochastic Time-Inverted Lagrangian Transport Model (STILT). They added high-level functions to make simulations using the R language. They added code to make parallelized simulations. They introduce a new method to deal with near-field emissions which have not yet been homogeneously mixed within the boundary layer. Fasoli et al. further introduce a smoothing technique to estimate plume surface response functions that is compared to the existing approach. Finally, they show how their developments perform in an experiment in which CO2 measurements have been taken aboard a light-rail in the Salt Lake City metropolitan area.*

*In general I find the manuscript well written, developments and results are presented in a concise and understandable manner. The manuscript fits the scope and contains enough scientific content to warrant publication in GMD. I have a number of comments that I would like to see addressed before publication, hence I end up with "minor revisions".*

### **General comments:**

*1) There is no mentioning of how this work and code repository relates to the original code repository and work at <http://stilt-model.org> / BGC Jena. None of the co-authors are from Jena or other developers of STILT. I can only assume that this development has been made in accordance and in agreement with the rest of the STILT developers, and that there are no licensing issues. Should be checked and stated explicitly.*

This work is intended to serve as the future replacement for the current "stiltR" wrapper, distributed from the BGC Jena SVN repository. We have been working with the BGC Jena team and the fortran source code remains hosted at BGC Jena. Migrating this wrapper code to GitHub has already enabled significant collaborative development between groups and has led to implementing features beyond those described in this paper.

*2) Model performance is assessed in a very qualitative manner ("looks better") and sometimes overly positive. I suggest authors consider more quantitative assessments, and take a step back before claiming (see below) e.g., that the model represents enhancements in (individual) roadways and intersections.*

Thank you for the suggestion. We have made an effort to improve the assessments of the results to quantify the differences between methods. Please see the specific comments regarding changes to the manuscript.

*3) While developing a new method to deal with incompletely mixed sources close to the receptor, the fall back to limiting mixing to the crude  $0.5 \cdot PBLH$  formulation. There is no physical basis for that, and I urge the authors to reconsider this artificial limitation. More on this below.*

See comment relating to p4 l7ff below.

**Specific comments:**

*p2 l31ff It is unclear to me why 1-10km and 0.1-1 hr spatial and time scales should qualify as "hyper" near-field. Unless you show that "near-field" is a common term that refers to larger spatial or temporal scales I suggest removing the "hyper", as is is hyperbole.*

We thank the reviewer for their comment as because it is important to clarify the naming conventions of domain length scales for readers. We chose the term "hyper near-field" as an extension of the definition of "near-field" in the foundational work of Lin et al 2003, which was "a domain extending over  $10^2$ - $10^3$ km". To clarify this definition in the text, we have added the following statement:

Previous work has defined the near-field domain as extending over  $10^2$  -  $10^3$  km (Lin et al., 2003).

*p3 l26ff Can this be used with other queue managers apart from SLURM?*

As of writing, SLURM is the only cluster job scheduler that has been implemented. SLURM is open source and utilized heavily by the high performance computing (HPC) systems at the University of Utah. Due to limited availability of HPC clusters, SLURM is the only job scheduler that has been validated. However, modifications to the project scaffolding described in this manuscript that facilitate parallel computation within single-node and SLURM-scheduled environments opens the doors to other queue managers as well. We encourage future collaboration with users who have access to these job schedulers and would be willing assist with testing development code on their systems. To clarify this in the text, we have added the following statement:

While SLURM is the only cluster job scheduler that has been implemented to date, the open source code can be modified to run on systems managed by other job schedulers including TORQUE/OpenPBS, Sun Grid Engine, OpenLava, Load Sharing Facility, or Docker Swarm using methods described by Lang et al. (2017).

*p4 l3ff Again, "hyper near-field" sounds very hyperbole and I suggest renaming it - you are talking about the region in which the well-mixed criterion does not hold.*

See comment relating to p2 l31ff above.

*p4 l7ff Mixing to  $h = 0.5 * PBLH$  (p4 l7) is a crude assumption with no physical meaning - if you would wait long enough you would have mixing into  $1.0 * PBLH$  (ignoring en- /detrainment) at the top of the BL.*

While we agree that the  $h = 0.5 PBLH$  mixing height serves as a crude assumption when used for vertically diluting surface fluxes, it has been extensively validated for the traditional "near-field" domain. This assumption was first introduced by Gerbig et al., 2003 (<https://doi.org/10.1029/2003JD003770>, Section 3.2. Depth of "Surface Layer") who performed a sensitivity study and found that "no significant change in the modeled vegetation signal was found" by varying the fraction of the PBL considered between 0.1 and 1.0.

The goal of this manuscript is to simplify the model workflow and improve STILT's relevance to the HNF domain. Further, the more complex formulation based on turbulence theory is implemented as an optional feature which can be disabled by the user to replicate past simulations while taking advantage of the other improvements described in this manuscript. With this in mind, we retained the traditional  $h = 0.5 PBLH$  for the "near-field" domain for consistency with previous work.

The following text has been added:

While the assumption that surface fluxes can instantaneously mix to  $h^*$  has been validated within the traditional near-field domain (Gerbig et al., 2003), this method underrepresents the influence of HNF fluxes on the tracer mole fraction arriving at the receptor.

*p4 l15ff You then derive a more complex formulation based on turbulence theory, which you propose to be better. However in the end you use  $h = \min(h', h^*)$ , with  $h^*$  the crude approximation (see above), which effectively stops dilution at  $0.5 * PBLH$ . This seems wrong - why not dilute up to whatever your new formula gives you, maybe cap at  $1.0 * PBLH$ ? There is no reason in reality why emissions from the ground should not be mixed further up than half the PBLH.*

As you say, the formulation of  $h = \min(h', h^*)$  results in the use of the turbulence theory estimation until the traditional  $0.5 PBLH$  is met. The model timestep at which  $h'$  is approximately equal to  $h^*$  is the transition between the "hyper near-field" and "near-field" domains. Rather than a rigid definition of the "hyper near-field" length scale, setting the dilution depth to  $\min(h', h^*)$  allows the "hyper near-field" spatial domain to adapt to meteorological conditions while enabling a smooth transition between the two methods of vertically diluting surface fluxes.

To clarify this point in the manuscript, the following text has been added:

The timestep at which  $h' \approx h^*$  signifies the transition between the HNF and traditional near-field domains. The formulation of  $h'$  grows the particle-specific dilution depth relative to local turbulence and enables the extent of the HNF domain to vary depending on receptor location, meteorological conditions, and local topography. For surface based applications,  $h'$  grows to  $h^*$  over 0.1 - 1 hr, affecting a spatial domain of 1 - 10 km adjacent to the receptor.

*p4 l21ff: this spatial domain should be variable and strongly dependent on receptor location, topography and meteorology - this should be emphasized. In general, sensitivity studies on how this new formulation performs are required.*

We agree that the spatial domain of the HNF is highly variable and have updated the text to clarify. See comment relating to p4 l15ff above.

*p4 l21ff: it should be mentioned how (whether?) this method will work with intermittent turbulence and nighttime (stable) conditions (see p7 l22 where you exclude nighttime values for such reasons).*

We agree that we should emphasize that nighttime turbulence is an unsolved problem that is beyond the scope of this manuscript.

The following text was added to ~p9L10:

We have defined the HNF using the effective vertical mixing depth of surface fluxes arriving at a receptor and shown this formulation to improve model agreement with observations. However, calculating the effective vertical mixing depth using turbulence variables  $\sigma_w$  and  $T_L$  does not extend well to stable nighttime conditions which remain a difficult problem (Holtslag et al., 2013) and a subject of future work.

*p4 l28: this should be Figure 4.*

Thanks for catching that mistake.

*p5 l8ff: explain better: which particles go into the sigma calculations?*

We have modified the equation notation and text to show that the sigma calculations are derived from the positions of all particles in the ensemble at each model timestep.

To clarify this in the text, we have modified the text following equation 3 to include:

where  $\sigma_x^2$  and  $\sigma_y^2$  are Euclidean variances in the x and y positions of all particles in the ensemble at time t.

*p5 l11: it would be helpful for the reader to see how  $b$  enters the two-dimensional Gaussian you are using for density estimation.*

While we agree that it is important to understand how the kernel bandwidth relates to the smoothing applied, visualizations and discussions regarding bandwidth selection and how it relates to bias-variance optimization can be found in many general descriptions of kernel density estimation.

To help the reader understand what effect the bandwidth has on the model output without requiring an additional visualization, we have added the following text to ~p5L17:

As model time or total ensemble dispersion increase, the kernel bandwidths increase the amount of smoothing applied to each particle.

*p5 l22ff: "improved" is based purely on visual aesthetics ("looks more similar!") - a quantitative measure would be very beneficial here.*

Agreed. We have performed additional analysis and added a quantitative measure for the difference between the calculation methods and the ideal case.

The following text has been added to ~p6L1:

The effects of varying the smoothing parameter ( $f = 1, 2$ ) are shown and errors are quantified using the difference of calculated grid cells from the idealized brute force case.

For the typical case ( $N = 200$  and  $f = 1$ ), the kernel density estimator shows improved agreement with the brute force method ( $\text{rmse} = 5.60 * 10^{-4}$  ppm ( $\text{umol}^{-1} \text{m}^2 \text{s}$ )) compared to the traditional dynamic grid coarsening ( $\text{rmse} = 5.79 * 10^{-4}$  ppm ( $\text{umol}^{-1} \text{m}^2 \text{s}$ )), preserving a Gaussian plume adjacent to the receptor, a clustered area of high influence, and capturing split flow upstream. When the kernel bandwidths are doubled by increasing the smoothing parameter ( $f = 2$ ), the footprint field becomes over-smoothed and becomes less similar with the brute force case ( $\text{rmse} = 5.66 * 10^{-4}$  ppm ( $\text{umol}^{-1} \text{m}^2 \text{s}$ )). In the extreme case using atypically few particles ( $N = 10$ ), the dynamic grid coarsening method produces a footprint field dominated by noise from individual particles ( $\text{rmse} = 6.12 * 10^{-4}$  ppm ( $\text{umol}^{-1} \text{m}^2 \text{s}$ )). The kernel density estimator ( $f = 1$ ) improves results but shows fragmentation further from the receptor ( $\text{rmse} = 5.75 * 10^{-4}$  ppm ( $\text{umol}^{-1} \text{m}^2 \text{s}$ )). In this case, the kernel density estimator smoothing parameter enables users to manually widen the plume reproduced in the footprint. Doubling the smoothing parameter ( $f = 2$ ) improves similarity with the smaller particle ensemble ( $\text{rmse} = 5.70 * 10^{-4}$  ppm ( $\text{umol}^{-1} \text{m}^2 \text{s}$ )) and demonstrates how users can modify the kernel bandwidths to adapt the model to unique cases. While tracer mole fraction differences between the two footprint calculation methods vary depending upon the locations of footprint differences relative to sources, tracer mole fractions calculated using the kernel density estimator are more similar to the idealized brute force case.

*p5 l27ff: "compensating" it might be, but only in the case here - just concede what f is: a fudge factor without physical mean.*

We have changed the language to highlight the reviewer's comment at ~p6L12:

In this case, the kernel density estimator smoothing parameter enables users to manually widen the plume reproduced in the footprint. Doubling the smoothing parameter ( $f = 2$ ) improves similarity with the smaller particle ensemble ( $\text{rmse} = 5.70 * 10^{-4} \text{ ppm (umol}^{-1} \text{ m}^2 \text{ s)}$ ) and demonstrates how users can modify the kernel bandwidths to adapt the model to unique cases.

*p7 l9: "dilution correction" refers to the fudge factor f being set to 2? Explain!*

We agree that using the terms "dilution correction" and "vertical mixing depth correction" interchangeably was confusing for readers. We have changed the text to "HNF vertical mixing depth" to be consistent with terms used in the methods description (Section 2.3).

The following text has been added to ~p7L14:

We compute footprint fields using the legacy dynamic grid coarsening (LEG) algorithm as well as gaussian kernel density estimation with the HNF vertical mixing depth correction (GWD) and without the HNF vertical mixing depth correction (GND) to illustrate the differences between methods.

*p7 l20ff: You are doing the right thing by ignoring nighttime values, but I suggest you still include the nighttime data in the plots to elucidate the magnitude of this problem - this is something that all model approaches have in common and it helps to remind people that comparing nighttime values is difficult and care needs to be taken.*

While we agree that it is useful to compare nighttime modeled values between manuscripts, the light-rail measurement platform only operates during specific hours of the day. We have clarified this in the text.

The following text has been added to ~p6L14:

The light-rail train typically operates between the hours of 05:00-23:00 Local Daylight Time (LDT) and only these hours were used in analyses.

*p8 l7: there is no appreciable "evening rush hour" peak in this figure. Neither does the model "capture" it, as it is too low throughout the day compared to observations. Remove.*

We agree that discussing an “evening rush hour peak” may be inaccurate in this context. The late afternoon increase in modeled CO<sub>2</sub> is the result of increased emissions from both anthropogenic inventories as well as meteorological factors. We have removed the text as the reviewer suggested.

*p8 l1 and Figure 7 caption: there are no consistent enhancements in modelled CO2 concentrations visible in the bottom right plot that would coincide with the individual intersections shown. I disagree with the statement that the method captures these enhancements. Rephrase and state more carefully what you actually can resolve.*

We agree that it is important to not inflate the improvements and the language describing spatial resolution needs to be more clearly defined.

The following text was added to ~p7L18:

This grid resolution was chosen to pair analyses with the 0.002° Hestia inventory and because 0.002° corresponds roughly with the size of a Salt Lake City block.

The following text was added to ~p8L21:

The model generally produced mole fraction enhancements ( $\Delta\text{CO}_2$ ) for grid cells containing or downwind from major roadways (Fig. 7). However, modeling intersection scale enhancements would require finer grid spacing capable of resolving sub-city-block spatial scales that is not yet feasible given current constraints on inventories, meteorological data, and computing resources.

The following text has been added to the Fig. 7 caption:

The model captures the overall urban-suburban-rural CO<sub>2</sub> mole fraction gradient (top) as well as localized enhancements near grid cells containing large emitters such as busy roads (bottom).

*p8 l18ff: Careful to make sure that you are not mistaking increasing resolution with the “hyper” near-field approach described earlier - this last section just shows that higher spatial resolution can be beneficial. Might want to rephrase “fine-scale approach”.*

We agree that readers may confuse the language with the hyper near-field definition. The text “fine-scale” has been changed to “0.002° grid resolution”.

*Figure 6: axis labels missing, should appear at least once for x and y*

We have added the axis labels (Longitude and Latitude) to Figure 6 as recommended.

*Figure 5 and 9: plot x axis from 0 to 24, add nighttime values (shade to make clear you don't use them).*

The hours that are not represented on the x-axis do not contain any data. See comment relating to p7 l20ff above for details.

*Figures 4, 6 - 8: Background maps at least for Figures 7-8 seem to come from Google Earth, are you sure you have the license to use and publish them?*

Google Maps and Google Earth permits use in periodicals

(<https://www.google.com/permissions/geoguidelines.html#maps-print>) with proper attribution.

However, it appears that the attributions were cropped out of several of the figures. The content was updated in accordance with Google's attribution guidelines

(<https://www.google.com/permissions/geoguidelines/attr-guide.html>).
